# Supplementary material
Source: HighWire-hosted journal article supplement (https://erj.ersjournals.com/content/49/6/1602456)
Supplement: inline-supplementary-material-1 [file inline-supplementary-material-1.pdf]

# Online Supplement data

## Monocytes inhibit NK activity via TGF $\beta$ in patients with obstructive sleep apnea

Enrique Hernández-Jiménez,<sup>1,2,§</sup> Carolina Cubillos-Zapata,<sup>1,2,§</sup> Victor Toledano,<sup>1,2</sup> Rebeca Pérez de Diego,<sup>1,2</sup> Isabel Fernández-Navarro,<sup>2,3</sup> Raquel Casitas,<sup>2,3</sup> Carlos Carpio,<sup>2,3</sup> Jose Casas-Martín,<sup>1</sup> Jaime Valentín,<sup>1</sup> Anibal Varela-Serrano,<sup>1</sup> Jose Avendaño-Ortiz,<sup>1</sup> Enrique Alvarez,<sup>4</sup> Luis A. Aguirre,<sup>1</sup> Antonio Pérez-Martínez,<sup>1</sup> Maria P De Miguel,<sup>5</sup> Cristobal Belda-Iniesta,<sup>6</sup> Francisco García-Río<sup>2,3,\*</sup> and Eduardo López-Collazo<sup>1,2,\*</sup>

<sup>1</sup>The Innate Immune Response Group, IdiPAZ, La Paz University Hospital, Madrid 28046, Spain;

<sup>2</sup>CIBER of Respiratory Diseases (CIBERES), Madrid, Spain;

<sup>3</sup>Respiratory Diseases Group, IdiPAZ and Respiratory Service of La Paz University Hospital, Madrid 28046, Spain;

<sup>4</sup>EMPIREO, Madrid, Spain;

<sup>5</sup>Cell Engineering Laboratory, La Paz University Hospital Research Institute, IdiPAZ, Madrid, Spain;

<sup>6</sup>Research Foundation HM Hospitals, Madrid, Spain

<sup>§</sup>These authors contributed equally to this work.

\*Correspondence to: Eduardo López-Collazo and Francisco García-Río ([elopezc@salud.madrid.org](mailto:elopezc@salud.madrid.org))

## **Supplementary Methods**

### **Study participants**

The diagnosis of OSA was established by respiratory polygraphy (Embletta GOLD, ResMed), which included continuous recordings of oronasal flow and pressure, heart rate, thoracic and abdominal respiratory movements and oxygen saturation (SpO<sub>2</sub>). Those tests in which the patients claimed to sleep less than 4 hours or in which there were less than 5 hours of nocturnal recording were repeated. Exclusion criteria were the following: previous or current treatment with oxygen or mechanical ventilation; underweight (body mass index [BMI] <18.5 Kg/m<sup>2</sup>) or morbid obesity (BMI >40 Kg/m<sup>2</sup>); history of respiratory or cardiovascular disease, including chronic obstructive pulmonary disease, asthma, respiratory failure, hypertension, heart failure and coronary artery disease; any infectious disease in the previous 3 months; diagnosis of malignancies or chronic inflammatory diseases; and the use of inhaled or systemic corticosteroids or other anti-inflammatory drugs.

### **Blood samples and peripheral blood mononuclear cells isolation**

Blood samples were obtained from the participants between 8:00 and 9:00 AM, following an overnight fast. PBMCs were isolated by centrifugation in Ficoll-Histopaque Plus (Amersham Biosciences) for flow cytometry and real-time quantitative PCR (RT-qPCR) analysis. For mechanistic and mRNA expression studies involving CD14<sup>+</sup> and NK cells, a specific isolation kit from Miltenyi Biotec was used. Cell purity was checked by flow cytometry showing >95% positive cells.

### **Reagents and cell lines**

DMEN (Invitrogen) and RPMI 14640 (Invitrogen) were used for the cell cultures. SB431542 (Biogen), and TGFβ1 antibodies (R&D Systems) were used for the inhibition assays. All reagents used for the cell cultures were tested for endotoxins using the Limulus amoebocyte lysate test (Lonza). The cell line K562 is authenticated and free from contamination by bacteria such as mycoplasma.

**Cytometric bead array**

TGF $\beta$ 1 levels in the sera and in the culture supernatants were determined using the TGF $\beta$  Flex Set (BD Biosciences), following the manufacturer's protocol, and they were analyzed by flow cytometry using a BD FACSCalibur flow cytometer (BD Biosciences). To activate the latent TGF $\beta$ 1 (TGF $\beta$ -LAP) sera samples have to be acidified to PH3.0 or lower for 10 minutes and neutralized back to PH 7.2 before testing. The active TGF $\beta$ 1 on supernatants were analyzed without acidification treatment.

**Cytotoxicity assay**

NK cytotoxicity was monitored using a conventional 2-h europium lysis-TDA release assay (Perkin-Elmer). The primary NK cells were used as effector cells. The TDA-labeled K562 cell line was used for target cells at effector-to target cell (E:T) ratios of 4:1, 2:1 and 1:1.

## Supplementary tables and figures

**Table E1.** The detail Antibodies for flow cytometry.

| Antibodies             | Clone     | Dye                         | Isotype |
|------------------------|-----------|-----------------------------|---------|
| Anti-human CD3         | SP34-2    | PerCP                       | IgG1    |
| Anti- human CD14       | M5E2      | APC or FITC                 | IgG2a   |
| Anti-human CD56        | B159      | FITC                        | IgG1    |
| Anti-human CD56        | NCAM16.2  | APC                         | IgG2b   |
| Anti-human CD16        | 3G8       | PE or FITC                  | IgG1    |
| Anti-human CD4         | L200      | PerCP                       | IgG1    |
| Anti-human CD8         | SK1       | PerCP                       | IgG1    |
| Anti-human CD25        | 2A3       | APC                         | IgG1    |
| Anti-human FOXP3       | 236A/E7   | PE                          | IgG1    |
| Anti-human Nkp30       | P30-15    | PE                          | IgG1    |
| Anti-human Nkp44       | P44-8     | PE                          | IgG1    |
| Anti-human Nkp46       | 9E2/Nkp46 | PE                          | IgG1    |
| Anti-human Smad2/Smad3 | O72-670   | PE                          | IgG1    |
| Anti-human CD117       | YB5.B8    | PE                          | IgG1    |
| Anti-human T-bet       | O4-46     | PE                          | IgG1    |
| Anti-human RORC        | Q21-559   | PE                          | IgG2b   |
| Anti-human Perforin    | δG9       | Alexa fluor 488             | IgG2b   |
| Anti-human EOMES*      | WD1928    | FITC                        | IgG1    |
| Anti-human CD28        | L293      | PE                          | IgG1    |
| Anti-human GARP        | 7B11      | APC                         | IgG2b   |
| Anti-human TGF         | TW4-E2    | PE                          | IgG1    |
| Anti human TCR γδ      | B1        | FITC                        | IgG1    |
| Anti-human IgG1        | G18-45    | FITC, APC, PE               | IgG1    |
| Anti-human IgG1        | MOPC-21   | PerCP                       | IgG1    |
| Anti-human IgG2a       | G155-178  | FITC or APC                 | IgG2a   |
| Anti-human IgG2b       | 27-35     | FITC, APC, PE<br>Alexa 488. | IgG2b   |

\*Anti-human EOMES was purchased from ThermoFisher

**Table E2.** Comparison of the three study groups at the inclusion moment\*

|                                          | <b>OSA group</b><br>(n=60) | <b>CPAP group</b><br>(after<br>treatment)†<br>(n=32) | <b>Healthy<br/>volunteers</b><br>(n=29) | <b>p-<br/>value‡</b> |
|------------------------------------------|----------------------------|------------------------------------------------------|-----------------------------------------|----------------------|
| Body mass index, Kg/m <sup>2</sup>       | 28.5 ± 4.6                 | 27.1 ± 4.6                                           | 27.4 ± 5.0                              | 0.514                |
| CPAP pressure, cmH <sub>2</sub> O        | -                          | 9 ± 1                                                | -                                       | -                    |
| Epworth Sleepiness Scale (ESS)           | 10.8 ± 4.5                 | 6.7 ± 2.5 ¶                                          | 4.1 ± 3.6 ¶                             | <0.001               |
| Daytime sleepiness (ESS ≥10)             | 33 (55.0)                  | 3 (9.4)                                              | 1 (3.4)                                 | <0.001               |
| AHI, events/h                            | 55.1 ± 18.2                | 6.7 ± 4.8 ¶                                          | 2.7 ± 1.2 ¶                             | <0.001               |
| Oxygen desaturation index, events/h      | 49.6 ± 22.3                | 6.8 ± 4.3 ¶                                          | 1.9 ± 1.1 ¶                             | <0.001               |
| Sleep time with SpO <sub>2</sub> <90%, % | 33.1 ± 29.0                | 5.6 ± 3.4 ¶                                          | 2.3 ± 2.8 ¶                             | <0.001               |
| Sleep time with SpO <sub>2</sub> <80%, % | 5.6 ± 9.6                  | 0.6 ± 1.1 §                                          | 0                                       | 0.003                |
| Low nocturnal SpO <sub>2</sub> , %       | 77.6 ± 6.9                 | 82.7 ± 5.6 ¶                                         | 87.6 ± 2.3 ¶                            | <0.001               |
| Mean nocturnal SpO <sub>2</sub> , %      | 89.9 ± 4.0                 | 91.4 ± 1.9 §                                         | 92.3 ± 1.5 §                            | 0.034                |

\* Values are mean ± SD or percentage.

†Values of the treated OSA patients refer to measurements performed 6 months after treatment with CPAP.

‡Comparisons between groups were performed by ANOVA or chi-squared test: § p<0.05 vs. OSA group; ¶ p<0.001 vs. OSA group; || p<0.05 vs. CPAP group.

Abbreviations: AHI = apnea-hypopnea index; SpO<sub>2</sub> = oxyhemoglobin saturation.

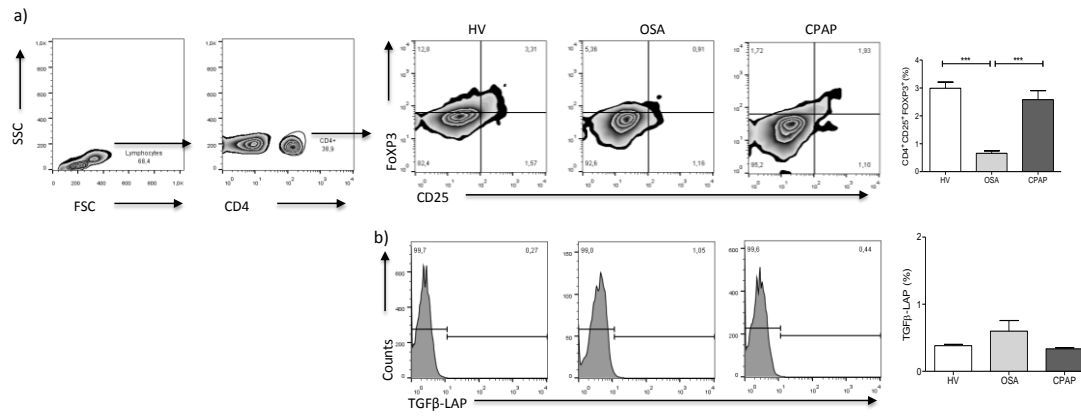

**Figure E1. Treg distribution and phenotype.**

PBMCs from HV (open bars, n=29), OSA (light grey bars, n=20 randomly selected), CPAP (dark grey boxes, n=20 randomly selected) were analyzed by flow cytometry. a) Gating strategy for the detection of Tregs. Numbers adjacent to outlined areas indicate the percentage of lymphocytes and CD4<sup>+</sup> cells. Representative dot blots of CD25 and FoXP3 expression on CD4<sup>+</sup> cells are shown. b) The percentage distribution of TGFβ-LAP on gated Tregs is shown. Standard histograms are shown. \*\*\*p<0.001 using Kruskal-Wallis test with a Dunn's multiple comparison.

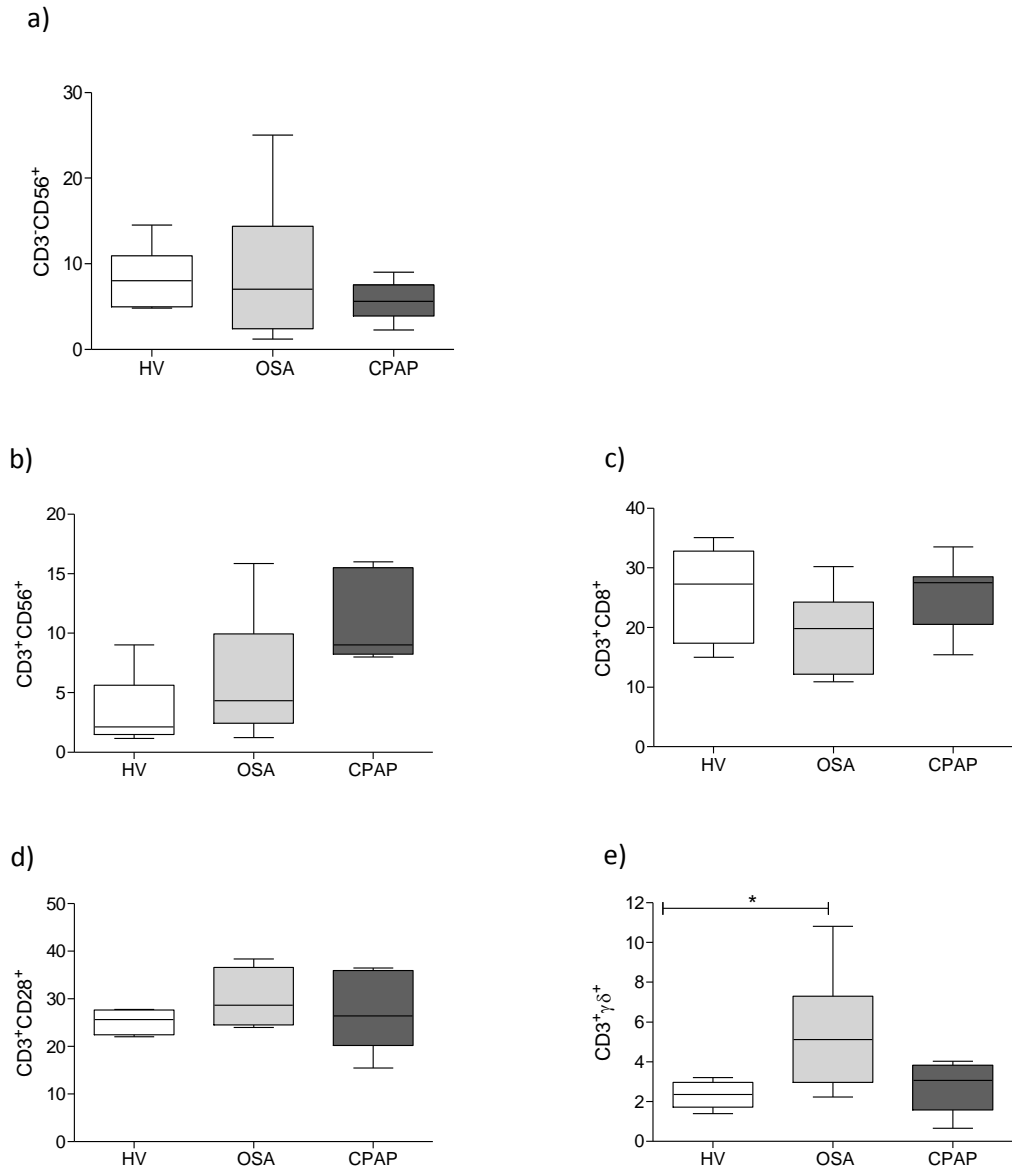

**Figure E2. Lymphocyte distribution and phenotype.**

Isolated PBMCs from HV (open boxes, n=20 randomly selected), OSA (light grey boxes, n=20 randomly selected), CPAP (dark grey boxes, n=20 randomly selected) were analysed by flow cytometry. The percentage distribution of a) CD3<sup>+</sup>CD56<sup>+</sup> b) CD3<sup>+</sup>CD56<sup>+</sup>, c) CD3<sup>+</sup>CD8<sup>+</sup>, d) CD3<sup>+</sup>CD28<sup>+</sup> and e) CD3<sup>+</sup>CDγδ<sup>+</sup> on total gated lymphocytes are shown.

\*p<0.05, using Kruskal-Wallis test with a Dunn's multiple comparison.

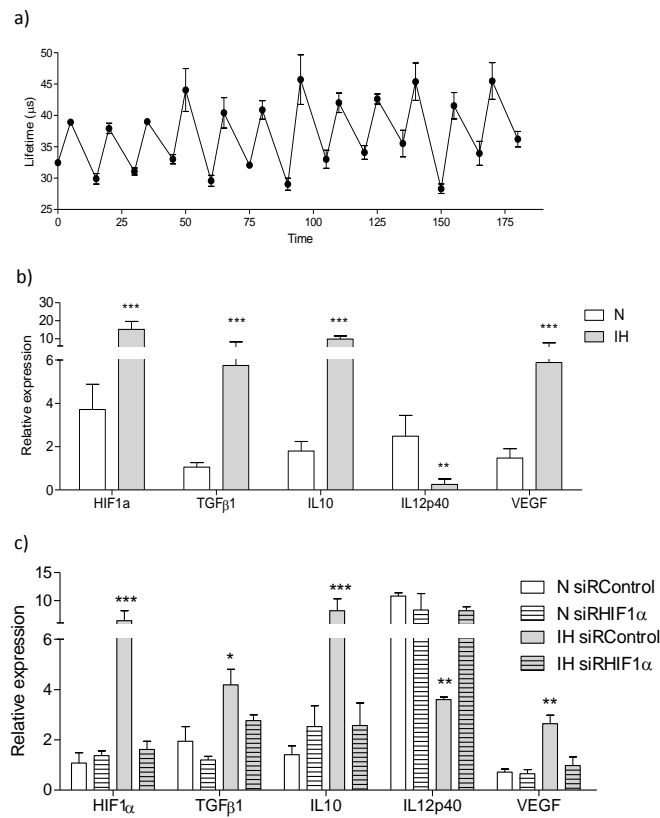

**Figure E3. Monocytes exhibit an immunosuppressive phenotype after intermittent hypoxia.**

CD14<sup>+</sup> monocytes were isolated from HV and cultured under normoxia (N, open bars, n=7) or intermittent hypoxia (IH, light gray bars, n=7) conditions. a) The effect of intermittent hypoxia on intracellular oxygen concentration in CD14<sup>+</sup> monocytes. Lifetimes of phosphorescent probe are shown. b) Expression analysis by qPCR of HIF1α, TGFβ1, IL10, IL12p40, and VEGF mRNA in CD14<sup>+</sup> monocytes. Relative expression is shown. \*p<.05; \*\*p<.01; \*\*\*p<.001, using a paired t-test.

CD14<sup>+</sup> monocytes isolated from HV were nucleofected with siRNAControl (30 nM, empty bars, n=6) or siRNAHIF1α (30 nM, striped bars, n=6). After 16 hours, the monocytes were cultured under normoxia (N, open bars, n=6) or intermittent hypoxia (IH, light gray bars, n=6) conditions. c) Expression analysis by qPCR of HIF1α, TGFβ1, IL10, IL12p40, and VEGF mRNA in CD14<sup>+</sup> monocytes. \*p<.05; \*\*p<.01; \*\*\*p<.001, siRControl compared with siRHIF1α using paired t-test.



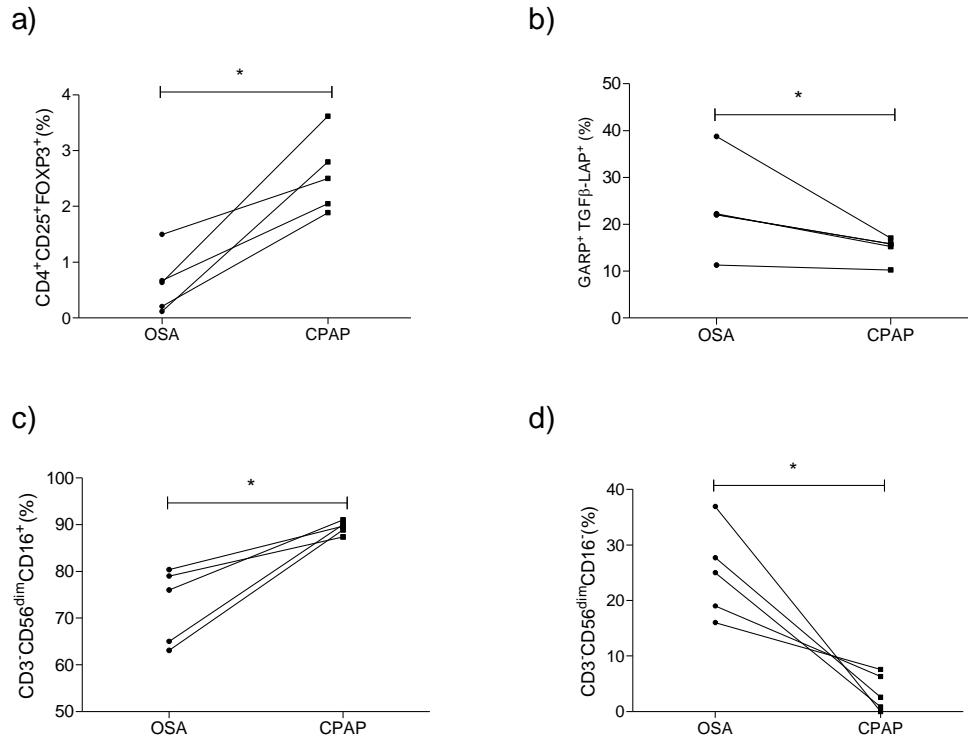

**Fig. E4. OSA recovers the healthy phenotype after more than six months of CPAP treatment.**

PBMCs isolated from patients with OSA (n= 5) were analyzed before and after 6 months of treatment (OSA and CPAP, respectively). a) The percentage distribution of Tregs (CD4<sup>+</sup>CD25<sup>+</sup>FOXP3<sup>+</sup>) on total gated T-lymphocytes. b) The percentage distribution of GARP<sup>+</sup>TGFβ-LAP<sup>+</sup> on total gated CD14<sup>+</sup> cells is shown. The percentage distribution of c) CD3<sup>+</sup>CD56<sup>dim</sup>CD16<sup>+</sup> and d) CD3<sup>+</sup>CD56<sup>dim</sup>CD16<sup>-</sup> on total gated NK cells. \*p<.05; \*\*p<.01, using a Wilcoxon test.
